# Supplementary material for: Chronic inflammatory demyelinating polyradiculoneuropathy presenting as predominantly sciatic monomelic neuropathy
Source: PubMed Central journal article supplement — BMJ Neurol Open. 2020 Apr 8;2(1):e000045. doi: 10.1136/bmjno-2020-000045 (PMC7871723; doi:10.1136/bmjno-2020-000045), 2020-04-08
Supplement: bmjno-2020-000045supp001.pdf [file bmjno-2020-000045supp001.pdf]

|                                        | 9<br>months         | 18<br>months | 36<br>months | 72<br>months | Normal<br>values |
|----------------------------------------|---------------------|--------------|--------------|--------------|------------------|
| <b><u>Nerve conduction studies</u></b> |                     |              |              |              |                  |
| <b>Common peroneal nerve (R/L)</b>     |                     |              |              |              |                  |
| Motor distal latency                   | 5/4.1               | 5.5/5        | 6.7/4.7      | 5.5/4        | ≤5.0             |
| CMAP amplitude                         | 2.6/6               | 2.5/4.8      | 2.5/3        | 3.2/6.7      | ≥2.0             |
| Motor CV                               | 44.4/52.8           | 34.3/52.6    | 40.4/47.2    | 43.3/46.6    | ≥42.0            |
| F wave latency                         | 59.8/NP             | NP/NP        | NP/NP        | NP/NP        | ≤57.0            |
| <b>Tibial nerve (R/L)</b>              |                     |              |              |              |                  |
| Motor distal latency                   | 4/3.8               | 7.4/5.2      | 7.6/5.8      | 4.5/4.3      | ≤6.0             |
| CMAP amplitude                         | 5.2/8.7             | 1.1/6.2      | 3.4/7        | 9.7/11.3     | ≥3.0             |
| Motor CV                               | 37.3/43.6           | 35.8/40.2    | 37.4/39.4    | 40.6/41.5    | ≥38.0            |
| F wave latency                         | 72.5/55.2           | 67.8/50.1    | 70.6/58      | 61/53        | ≤57.0            |
| <b>Sural nerve (R/L)</b>               |                     |              |              |              |                  |
| Distal latency                         | 3.3/3               | */3.1        | */2.7        | */4.1        | ≤3.0             |
| SNAP amplitude                         | 0.3/6.3             | */12.9       | */16.5       | */14.6       | ≥5.0             |
| Sensory CV                             | 39.4/52.5           | */47.1       | */50         | */52.3       | ≥38.0            |
| <b><u>Needle examination</u></b>       |                     |              |              |              |                  |
| <b>Tibialis anterior (R/L)</b>         |                     |              |              |              |                  |
| Fibrillation potentials                | None/None           | NP/NP        | NP/NP        | NP/NP        | -                |
| MUP recruitment                        | Reduced/<br>Reduced | NP/NP        | NP/NP        | NP/NP        | -                |
| <b>Gastrocnemius</b>                   |                     |              |              |              |                  |
| Fibrillation potentials                | 1+/NP               | NP/NP        | NP/NP        | NP/NP        | -                |
| MUP recruitment                        | Discrete/NP         | NP/NP        | NP/NP        | NP/NP        | -                |
| <b>Right vastus lateralis</b>          |                     |              |              |              |                  |
| Fibrillation potentials                | None/NP             | NP/NP        | NP/NP        | NP/NP        | -                |
| MUP recruitment                        | Reduced/NP          | NP/NP        | NP/NP        | NP/NP        | -                |

**Table 1.** Serial nerve conduction studies and needle electromyography. CMAP = compound muscle action potential (millivolts); CV = conduction velocity (metres/second); SNAP = sensory nerve action potential (microvolts); MUP = motor unit potential; NP = not performed; \* = no response post-right-sided sural nerve biopsy.
